# Supplementary material for: Putting the cart before the horse: mixed-methods participatory investigation of working equid harnessing practices in three selected towns of the Oromia national regional state in Ethiopia
Source: PubMed Central journal article supplement (PMC10958837; doi:10.1186/s12917-024-03967-3), 2024-03-22
Supplement: 12917_2024_3967_MOESM1_ESM.pdf [file 12917_2024_3967_MOESM1_ESM.pdf]

**Supplement 1 – Data collection sheets for the survey of animal welfare and work equipment indicators and questionnaires to the respective cart-driver**

Animal-cart ID

**Animal-Cart Unit Record**

Town:  Bishoftu     Shashamene     Selale    Location: \_\_\_\_\_    Date: \_\_\_/\_\_\_/\_\_\_

**Animal Signalment**

Species:  Donkey     Horse     Mule    Gender:  Female     Male Entire     Male Castrated

Age: \_\_\_\_\_ years    Height: \_\_\_\_\_ cm    Breed: \_\_\_\_\_

**Work**

|                                 |                           |                                                       |
|---------------------------------|---------------------------|-------------------------------------------------------|
| Work Type: _____% Taxi (people) | Work per week: _____ days | Average planned breaks during work: _____ breaks      |
| _____ % Transport goods         |                           |                                                       |
| _____ % Transport water         | Work per day: _____ hours | Average duration of each planned break: _____ minutes |
| _____ % Other: _____            |                           |                                                       |

**Welfare Parameter Scores**

|                                                                                                                                                                                                     |                                                                                                                                                                                                                                                                                                                                                                                                                        |                                                                                                                                                                                                                       |      |                            |                                     |                            |                                         |                            |                                            |                                                                                                                                                                                                                                                                                                                                                                                                                        |       |      |                            |                                     |                            |                                         |                            |                                            |
|-----------------------------------------------------------------------------------------------------------------------------------------------------------------------------------------------------|------------------------------------------------------------------------------------------------------------------------------------------------------------------------------------------------------------------------------------------------------------------------------------------------------------------------------------------------------------------------------------------------------------------------|-----------------------------------------------------------------------------------------------------------------------------------------------------------------------------------------------------------------------|------|----------------------------|-------------------------------------|----------------------------|-----------------------------------------|----------------------------|--------------------------------------------|------------------------------------------------------------------------------------------------------------------------------------------------------------------------------------------------------------------------------------------------------------------------------------------------------------------------------------------------------------------------------------------------------------------------|-------|------|----------------------------|-------------------------------------|----------------------------|-----------------------------------------|----------------------------|--------------------------------------------|
| General Attitude: <input type="checkbox"/> Positive<br><input type="checkbox"/> Non-reactive<br><input type="checkbox"/> Negative                                                                   | BCS: <input type="checkbox"/> 1 - Very thin<br><input type="checkbox"/> 2 - Thin<br><input type="checkbox"/> 3 - Ideal<br><input type="checkbox"/> 4 - Fat<br><input type="checkbox"/> 5 - Very fat                                                                                                                                                                                                                    | Gait: <input type="checkbox"/> Not lame<br><input type="checkbox"/> Moderately lame<br><input type="checkbox"/> Severely lame<br><input type="checkbox"/> Not weight-bearing<br><input type="checkbox"/> Not assessed |      |                            |                                     |                            |                                         |                            |                                            |                                                                                                                                                                                                                                                                                                                                                                                                                        |       |      |                            |                                     |                            |                                         |                            |                                            |
| Response to Spinal Contact: <input type="checkbox"/> No reaction<br><input type="checkbox"/> Weak reaction<br><input type="checkbox"/> Strong reaction                                              | Limb Score: <table border="0" style="display: inline-table; vertical-align: top;"> <tr><td>Front</td><td>Hind</td></tr> <tr><td><input type="checkbox"/> 0</td><td><input type="checkbox"/> 0 (normal)</td></tr> <tr><td><input type="checkbox"/> 1</td><td><input type="checkbox"/> 1 (1 abnormal)</td></tr> <tr><td><input type="checkbox"/> 2</td><td><input type="checkbox"/> 2 (both abnormal)</td></tr> </table> | Front                                                                                                                                                                                                                 | Hind | <input type="checkbox"/> 0 | <input type="checkbox"/> 0 (normal) | <input type="checkbox"/> 1 | <input type="checkbox"/> 1 (1 abnormal) | <input type="checkbox"/> 2 | <input type="checkbox"/> 2 (both abnormal) | Hoof Score: <table border="0" style="display: inline-table; vertical-align: top;"> <tr><td>Front</td><td>Hind</td></tr> <tr><td><input type="checkbox"/> 0</td><td><input type="checkbox"/> 0 (normal)</td></tr> <tr><td><input type="checkbox"/> 1</td><td><input type="checkbox"/> 1 (1 abnormal)</td></tr> <tr><td><input type="checkbox"/> 2</td><td><input type="checkbox"/> 2 (both abnormal)</td></tr> </table> | Front | Hind | <input type="checkbox"/> 0 | <input type="checkbox"/> 0 (normal) | <input type="checkbox"/> 1 | <input type="checkbox"/> 1 (1 abnormal) | <input type="checkbox"/> 2 | <input type="checkbox"/> 2 (both abnormal) |
| Front                                                                                                                                                                                               | Hind                                                                                                                                                                                                                                                                                                                                                                                                                   |                                                                                                                                                                                                                       |      |                            |                                     |                            |                                         |                            |                                            |                                                                                                                                                                                                                                                                                                                                                                                                                        |       |      |                            |                                     |                            |                                         |                            |                                            |
| <input type="checkbox"/> 0                                                                                                                                                                          | <input type="checkbox"/> 0 (normal)                                                                                                                                                                                                                                                                                                                                                                                    |                                                                                                                                                                                                                       |      |                            |                                     |                            |                                         |                            |                                            |                                                                                                                                                                                                                                                                                                                                                                                                                        |       |      |                            |                                     |                            |                                         |                            |                                            |
| <input type="checkbox"/> 1                                                                                                                                                                          | <input type="checkbox"/> 1 (1 abnormal)                                                                                                                                                                                                                                                                                                                                                                                |                                                                                                                                                                                                                       |      |                            |                                     |                            |                                         |                            |                                            |                                                                                                                                                                                                                                                                                                                                                                                                                        |       |      |                            |                                     |                            |                                         |                            |                                            |
| <input type="checkbox"/> 2                                                                                                                                                                          | <input type="checkbox"/> 2 (both abnormal)                                                                                                                                                                                                                                                                                                                                                                             |                                                                                                                                                                                                                       |      |                            |                                     |                            |                                         |                            |                                            |                                                                                                                                                                                                                                                                                                                                                                                                                        |       |      |                            |                                     |                            |                                         |                            |                                            |
| Front                                                                                                                                                                                               | Hind                                                                                                                                                                                                                                                                                                                                                                                                                   |                                                                                                                                                                                                                       |      |                            |                                     |                            |                                         |                            |                                            |                                                                                                                                                                                                                                                                                                                                                                                                                        |       |      |                            |                                     |                            |                                         |                            |                                            |
| <input type="checkbox"/> 0                                                                                                                                                                          | <input type="checkbox"/> 0 (normal)                                                                                                                                                                                                                                                                                                                                                                                    |                                                                                                                                                                                                                       |      |                            |                                     |                            |                                         |                            |                                            |                                                                                                                                                                                                                                                                                                                                                                                                                        |       |      |                            |                                     |                            |                                         |                            |                                            |
| <input type="checkbox"/> 1                                                                                                                                                                          | <input type="checkbox"/> 1 (1 abnormal)                                                                                                                                                                                                                                                                                                                                                                                |                                                                                                                                                                                                                       |      |                            |                                     |                            |                                         |                            |                                            |                                                                                                                                                                                                                                                                                                                                                                                                                        |       |      |                            |                                     |                            |                                         |                            |                                            |
| <input type="checkbox"/> 2                                                                                                                                                                          | <input type="checkbox"/> 2 (both abnormal)                                                                                                                                                                                                                                                                                                                                                                             |                                                                                                                                                                                                                       |      |                            |                                     |                            |                                         |                            |                                            |                                                                                                                                                                                                                                                                                                                                                                                                                        |       |      |                            |                                     |                            |                                         |                            |                                            |
| Shoes: <input type="checkbox"/> x1 <input type="checkbox"/> No Shoes<br><input type="checkbox"/> x2 <input type="checkbox"/> No Shoes<br><input type="checkbox"/> x3<br><input type="checkbox"/> x4 | Shoe Type: <input type="checkbox"/> Metal<br><input type="checkbox"/> Rubber<br><input type="checkbox"/> Other: _____                                                                                                                                                                                                                                                                                                  | Harness Removed for Assessment: <input type="checkbox"/> BCS<br><input type="checkbox"/> Gait<br><input type="checkbox"/> Spinal Contact<br><input type="checkbox"/> Wounds                                           |      |                            |                                     |                            |                                         |                            |                                            |                                                                                                                                                                                                                                                                                                                                                                                                                        |       |      |                            |                                     |                            |                                         |                            |                                            |

**Wounds**  Photos

Size: 1 = small; 2 = medium; 3 = large / Severity: 1 = superficial/healed; 2 = skin and subcutaneous; 3 = deeper structures

| Harness-Related Wounds |        |            |                | Other Wounds          |        |            |                |
|------------------------|--------|------------|----------------|-----------------------|--------|------------|----------------|
|                        | Number | Size (1-3) | Severity (1-3) |                       | Number | Size (1-3) | Severity (1-3) |
| Bit                    |        |            |                | Encouragement         |        |            |                |
| Blinker                |        |            |                | Hobble                |        |            |                |
| Chest-band             |        |            |                | Traditional Practices |        |            |                |
| Girth                  |        |            |                | Limbs                 |        |            |                |
| Saddle                 |        |            |                | Other                 |        |            |                |
| Tail                   |        |            |                |                       |        |            |                |
| Shafts                 |        |            |                |                       |        |            |                |

**Harness**

**Transmission**

|                                                 |                              |                                                                                                                                                                                                                                |                                                                                                                |                              |                                                                                                                                                                                                                                |
|-------------------------------------------------|------------------------------|--------------------------------------------------------------------------------------------------------------------------------------------------------------------------------------------------------------------------------|----------------------------------------------------------------------------------------------------------------|------------------------------|--------------------------------------------------------------------------------------------------------------------------------------------------------------------------------------------------------------------------------|
| Breast collar<br><input type="checkbox"/> Photo | <input type="checkbox"/> Yes | Material<br><input type="checkbox"/> Fabric<br><input type="checkbox"/> Nylon<br><input type="checkbox"/> Leather<br><input type="checkbox"/> Rubber<br><input type="checkbox"/> Rope<br><input type="checkbox"/> Other: _____ | Position<br><input type="checkbox"/> Pectoral<br><input type="checkbox"/> High<br><input type="checkbox"/> Low | <input type="checkbox"/> Yes | Material<br><input type="checkbox"/> Fabric<br><input type="checkbox"/> Nylon<br><input type="checkbox"/> Leather<br><input type="checkbox"/> Rubber<br><input type="checkbox"/> Rope<br><input type="checkbox"/> Other: _____ |
|                                                 | <input type="checkbox"/> No  |                                                                                                                                                                                                                                |                                                                                                                | <input type="checkbox"/> No  |                                                                                                                                                                                                                                |
| Width: _____ cm                                 |                              | Adjustable<br><input type="checkbox"/> Yes<br><input type="checkbox"/> No                                                                                                                                                      | Thickness<br><input type="checkbox"/> Adequate<br><input type="checkbox"/> Inadequate                          |                              |                                                                                                                                                                                                                                |

**Breeching**  Photo

|                                                                                                                       |                                                                                                                                                                                                                                |
|-----------------------------------------------------------------------------------------------------------------------|--------------------------------------------------------------------------------------------------------------------------------------------------------------------------------------------------------------------------------|
| Present<br><input type="checkbox"/> No<br><input type="checkbox"/> Yes - True<br><input type="checkbox"/> Yes - False | Material<br><input type="checkbox"/> Fabric<br><input type="checkbox"/> Nylon<br><input type="checkbox"/> Leather<br><input type="checkbox"/> Rubber<br><input type="checkbox"/> Rope<br><input type="checkbox"/> Other: _____ |
| Assembly<br><input type="checkbox"/> Adequate<br><input type="checkbox"/> Inadequate                                  |                                                                                                                                                                                                                                |

|                                                                           |                                                                        |                                                                                                                                                                                                                                |
|---------------------------------------------------------------------------|------------------------------------------------------------------------|--------------------------------------------------------------------------------------------------------------------------------------------------------------------------------------------------------------------------------|
| Neck Strap<br><input type="checkbox"/> Photo                              | Present<br><input type="checkbox"/> Yes<br><input type="checkbox"/> No | Material<br><input type="checkbox"/> Fabric<br><input type="checkbox"/> Nylon<br><input type="checkbox"/> Leather<br><input type="checkbox"/> Rubber<br><input type="checkbox"/> Rope<br><input type="checkbox"/> Other: _____ |
| Adjustable<br><input type="checkbox"/> Yes<br><input type="checkbox"/> No |                                                                        |                                                                                                                                                                                                                                |

|                                                                                |                                                                        |                                                                                                                                                                                                                                |
|--------------------------------------------------------------------------------|------------------------------------------------------------------------|--------------------------------------------------------------------------------------------------------------------------------------------------------------------------------------------------------------------------------|
| Traces<br><input type="checkbox"/> Photo                                       | Present<br><input type="checkbox"/> Yes<br><input type="checkbox"/> No | Material<br><input type="checkbox"/> Fabric<br><input type="checkbox"/> Nylon<br><input type="checkbox"/> Leather<br><input type="checkbox"/> Rubber<br><input type="checkbox"/> Rope<br><input type="checkbox"/> Other: _____ |
| Movement<br><input type="checkbox"/> Free<br><input type="checkbox"/> Not Free |                                                                        |                                                                                                                                                                                                                                |

**Steering**

|                                                             |                                                                    |                                                                             |                                                                          |
|-------------------------------------------------------------|--------------------------------------------------------------------|-----------------------------------------------------------------------------|--------------------------------------------------------------------------|
| Bit<br><input type="checkbox"/> Photo                       | Bit<br><input type="checkbox"/> Yes<br><input type="checkbox"/> No | Condition<br><input type="checkbox"/> Good<br><input type="checkbox"/> Poor | Size<br><input type="checkbox"/> Fit<br><input type="checkbox"/> Not fit |
| Blinkers<br><input type="checkbox"/> Photo                  |                                                                    |                                                                             |                                                                          |
| <input type="checkbox"/> Yes<br><input type="checkbox"/> No | <input type="checkbox"/> Dished<br><input type="checkbox"/> Flat   | <input type="checkbox"/> Touching<br><input type="checkbox"/> Not Touching  |                                                                          |

|                                           |                                                                        |                                                                       |                                                                      |                                                                                                                              |
|-------------------------------------------|------------------------------------------------------------------------|-----------------------------------------------------------------------|----------------------------------------------------------------------|------------------------------------------------------------------------------------------------------------------------------|
| Swingle<br><input type="checkbox"/> Photo | Present<br><input type="checkbox"/> Yes<br><input type="checkbox"/> No | attach<br><input type="checkbox"/> Yes<br><input type="checkbox"/> No | Moves<br><input type="checkbox"/> Yes<br><input type="checkbox"/> No | Is the breast collar positioned through the point of draught?<br><input type="checkbox"/> Yes<br><input type="checkbox"/> No |
|                                           |                                                                        |                                                                       |                                                                      |                                                                                                                              |

|                                         |                                                             |                                                                                    |
|-----------------------------------------|-------------------------------------------------------------|------------------------------------------------------------------------------------|
| Reins<br><input type="checkbox"/> Photo | <input type="checkbox"/> Yes<br><input type="checkbox"/> No | <input type="checkbox"/> Move Freely<br><input type="checkbox"/> Don't move freely |
|-----------------------------------------|-------------------------------------------------------------|------------------------------------------------------------------------------------|

**Weight Distribution**

| Saddle                                                                 |                                                                                                                      |                                                                                |                                                                                                                    |                                                                         |                                                                                     |
|------------------------------------------------------------------------|----------------------------------------------------------------------------------------------------------------------|--------------------------------------------------------------------------------|--------------------------------------------------------------------------------------------------------------------|-------------------------------------------------------------------------|-------------------------------------------------------------------------------------|
| Present<br><input type="checkbox"/> Yes<br><input type="checkbox"/> No | Material<br><input type="checkbox"/> Wood<br><input type="checkbox"/> Metal<br><input type="checkbox"/> Other: _____ | Shape<br><input type="checkbox"/> Gullet<br><input type="checkbox"/> No Gullet | Position<br><input type="checkbox"/> Adequate<br><input type="checkbox"/> Withers<br><input type="checkbox"/> Back | Fit<br><input type="checkbox"/> Tight<br><input type="checkbox"/> Loose | Pressure Points<br><input type="checkbox"/> Narrow<br><input type="checkbox"/> Wide |

| Saddle Padding                                                         |                                                                                                                               |                      |
|------------------------------------------------------------------------|-------------------------------------------------------------------------------------------------------------------------------|----------------------|
| Padding<br><input type="checkbox"/> Yes<br><input type="checkbox"/> No | Thickness<br><input type="checkbox"/> Adequate<br><input type="checkbox"/> Insufficient<br><input type="checkbox"/> Excessive | Description<br>_____ |

| Back Band                                                                                                                                                                                                                                           | Girth                                                                                                                                                                                                                                               | Belly Band                                                                                                                                                                                                                                          | Crupper                                                                                                                                                                                                                                             | Tugs                                                                                                          |
|-----------------------------------------------------------------------------------------------------------------------------------------------------------------------------------------------------------------------------------------------------|-----------------------------------------------------------------------------------------------------------------------------------------------------------------------------------------------------------------------------------------------------|-----------------------------------------------------------------------------------------------------------------------------------------------------------------------------------------------------------------------------------------------------|-----------------------------------------------------------------------------------------------------------------------------------------------------------------------------------------------------------------------------------------------------|---------------------------------------------------------------------------------------------------------------|
| <input type="checkbox"/> None<br><input type="checkbox"/> Fabric<br><input type="checkbox"/> Nylon<br><input type="checkbox"/> Leather<br><input type="checkbox"/> Rubber<br><input type="checkbox"/> Rope<br><input type="checkbox"/> Other: _____ | <input type="checkbox"/> None<br><input type="checkbox"/> Fabric<br><input type="checkbox"/> Nylon<br><input type="checkbox"/> Leather<br><input type="checkbox"/> Rubber<br><input type="checkbox"/> Rope<br><input type="checkbox"/> Other: _____ | <input type="checkbox"/> None<br><input type="checkbox"/> Fabric<br><input type="checkbox"/> Nylon<br><input type="checkbox"/> Leather<br><input type="checkbox"/> Rubber<br><input type="checkbox"/> Rope<br><input type="checkbox"/> Other: _____ | <input type="checkbox"/> None<br><input type="checkbox"/> Fabric<br><input type="checkbox"/> Nylon<br><input type="checkbox"/> Leather<br><input type="checkbox"/> Rubber<br><input type="checkbox"/> Rope<br><input type="checkbox"/> Other: _____ | <input type="checkbox"/> None<br><input type="checkbox"/> Yes - loose<br><input type="checkbox"/> Yes - tight |
| Photos<br><input type="checkbox"/> Saddle <input type="checkbox"/> Girth<br><input type="checkbox"/> Backband <input type="checkbox"/> Crupper<br><input type="checkbox"/> Belly Band <input type="checkbox"/> Tugs                                 |                                                                                                                                                                                                                                                     |                                                                                                                                                                                                                                                     |                                                                                                                                                                                                                                                     |                                                                                                               |

|                                                                                                                                                                          |  |  |
|--------------------------------------------------------------------------------------------------------------------------------------------------------------------------|--|--|
| Do shafts pass through center of gravity?<br><input type="checkbox"/> No<br><input type="checkbox"/> Yes - Horizontally<br><input type="checkbox"/> Yes - Not Horizontal |  |  |
| Appropriate shaft width?<br><input type="checkbox"/> Yes<br><input type="checkbox"/> No - Too wide<br><input type="checkbox"/> No - Too narrow                           |  |  |

| Cart                     |                         |                                                                                                                                                            |                                                                              |  |  |
|--------------------------|-------------------------|------------------------------------------------------------------------------------------------------------------------------------------------------------|------------------------------------------------------------------------------|--|--|
| Number of animals: _____ | Number of wheels: _____ | Wheel type:<br><input type="checkbox"/> Wood<br><input type="checkbox"/> Pneumatic - good inflation<br><input type="checkbox"/> Pneumatic - poor inflation | Axle balance:<br><input type="checkbox"/> Yes<br><input type="checkbox"/> No |  |  |

|                                                                                         |                                                                                      |
|-----------------------------------------------------------------------------------------|--------------------------------------------------------------------------------------|
| Is the girth adjustable?<br><input type="checkbox"/> Yes<br><input type="checkbox"/> No | Is the harness clean?<br><input type="checkbox"/> Yes<br><input type="checkbox"/> No |
|-----------------------------------------------------------------------------------------|--------------------------------------------------------------------------------------|

**Comments**

Animal-cart ID

## Cart-Driver Questionnaire

### Animal-Cart Unit Record

Town:  Bishoftu       Shashamene      Location: .....      Date: \_\_/\_\_/\_\_  
 Selale

### Demographics

Gender:  Male      Age: .....      Level of Education:  No formal education  
 Female       Rather not say       Primary education  
 Other       Rather not say       Early secondary  
 Rather not say      Number of dependents: .....       Late secondary  
 Rather not say       Tertiary education  
 Rather not say

### Occupation Relating to Working Equids

Ownership of animal:  Owner and driver      Number of equids owned: .....      Experience as driver: ..... years      Is driving the main occupation:  Yes  No  
 Driver only       Rather not say      Experience with equids: ..... years

Given your current needs and financial responsibilities, would you say that you and your household are:  Finding it difficult  Just managing  Comfortable  Very comfortable  Prospering  Rather not say

Approximate percentage of income derived from cart-driving? .....%

Enjoyment of driving occupation:  1  2  3  4  5  
*1=strongly dislike 5=strongly enjoy*

Source of Training as a Driver: .....

### Choice of Equipment

Are you responsible for the choice of cart and harness for your animal?  Yes  No      If "No", who is? .....

Where have you obtained your harness equipment?  Purchased  Inherited  Donated       Home-made  Partly purchased and home-made  Other: .....

If "Home-made" or "Partly purchased and home-made", please explain why:  Cost  Availability  Tradition       Design  Responsibility  Other: .....

If "Purchased" or "Partly purchased", where was it purchased from? .....

What is the near cost of your harness? .....

What is the near cost of your cart? .....

Which factors influence your decision when choosing this equipment? (select as many as apply)

|                                    |                                      |                                         |
|------------------------------------|--------------------------------------|-----------------------------------------|
| <input type="checkbox"/> Cost      | <input type="checkbox"/> Ease of use | <input type="checkbox"/> Location       |
| <input type="checkbox"/> Design    | <input type="checkbox"/> Popularity  | <input type="checkbox"/> Recommendation |
| <input type="checkbox"/> Materials | <input type="checkbox"/> Maker       | <input type="checkbox"/> Availability   |
| <input type="checkbox"/> Tradition | <input type="checkbox"/> Culture     | <input type="checkbox"/> Other: .....   |

Which of these factors has the highest importance to you? (select only one)

|                                    |                                      |                                         |
|------------------------------------|--------------------------------------|-----------------------------------------|
| <input type="checkbox"/> Cost      | <input type="checkbox"/> Ease of use | <input type="checkbox"/> Location       |
| <input type="checkbox"/> Design    | <input type="checkbox"/> Popularity  | <input type="checkbox"/> Recommendation |
| <input type="checkbox"/> Materials | <input type="checkbox"/> Maker       | <input type="checkbox"/> Availability   |
| <input type="checkbox"/> Tradition | <input type="checkbox"/> Culture     | <input type="checkbox"/> Other: .....   |

| Equipment Maintenance                                                                                              |                              |                             |                                   |                          |                          |
|--------------------------------------------------------------------------------------------------------------------|------------------------------|-----------------------------|-----------------------------------|--------------------------|--------------------------|
| Does the work equipment you use receive any routine maintenance?                                                   | <input type="checkbox"/> Yes | <input type="checkbox"/> No | <input type="checkbox"/> Not sure |                          |                          |
| Are you responsible for the routine maintenance of the equipment?                                                  | <input type="checkbox"/> Yes | <input type="checkbox"/> No | If "No", who is?<br>.....         |                          |                          |
| With what frequency does the work equipment you use receive maintenance and how is the maintenance best described? | Harness                      | Cart                        |                                   | Harness                  | Cart                     |
|                                                                                                                    | <input type="checkbox"/>     | <input type="checkbox"/>    | Daily                             | <input type="checkbox"/> | <input type="checkbox"/> |
|                                                                                                                    | <input type="checkbox"/>     | <input type="checkbox"/>    | Weekly                            | <input type="checkbox"/> | <input type="checkbox"/> |
|                                                                                                                    | <input type="checkbox"/>     | <input type="checkbox"/>    | Monthly                           | <input type="checkbox"/> | <input type="checkbox"/> |
|                                                                                                                    | <input type="checkbox"/>     | <input type="checkbox"/>    | Yearly                            | <input type="checkbox"/> | <input type="checkbox"/> |
|                                                                                                                    | <input type="checkbox"/>     | <input type="checkbox"/>    | Other: .....                      | <input type="checkbox"/> | <input type="checkbox"/> |
|                                                                                                                    |                              |                             | Inspecting                        | <input type="checkbox"/> |                          |
|                                                                                                                    |                              |                             | Cleaning                          | <input type="checkbox"/> |                          |
|                                                                                                                    |                              |                             | Brushing                          | <input type="checkbox"/> |                          |
|                                                                                                                    |                              |                             | Oiling                            | <input type="checkbox"/> |                          |
|                                                                                                                    |                              |                             | Other: .....                      | <input type="checkbox"/> |                          |

| Assembly and Hitching                                                      |                                        |                                        |                                        |                                        |                                                   |
|----------------------------------------------------------------------------|----------------------------------------|----------------------------------------|----------------------------------------|----------------------------------------|---------------------------------------------------|
| Are you responsible for assembling the harness and hitching your animal?   | <input type="checkbox"/> Yes           | <input type="checkbox"/> No            | If "No", who is?<br>.....              |                                        |                                                   |
| How have you learnt about harness assembly and hitching?                   | <input type="checkbox"/> Intuition     | <input type="checkbox"/> Observation   | <input type="checkbox"/> Other drivers | <input type="checkbox"/> Harness maker | <input type="checkbox"/> Research                 |
|                                                                            |                                        |                                        |                                        |                                        | <input type="checkbox"/> Other: .....             |
| Where do you go to for additional information about work equipment?        | <input type="checkbox"/> Other drivers | <input type="checkbox"/> Harness maker | <input type="checkbox"/> Research      | <input type="checkbox"/> Community     | <input type="checkbox"/> Veterinary professionals |
|                                                                            |                                        |                                        |                                        |                                        | <input type="checkbox"/> NGOs                     |
|                                                                            |                                        |                                        |                                        |                                        | <input type="checkbox"/> Other: .....             |
| If possible, would you change anything about your current harness or cart? | <input type="checkbox"/> Yes           | <input type="checkbox"/> No            | <input type="checkbox"/> Not sure      | If "Yes", what?<br>.....               |                                                   |
| Do you believe your harness is currently assembled correctly?              | <input type="checkbox"/> Yes           | <input type="checkbox"/> No            | <input type="checkbox"/> Not sure      |                                        |                                                   |
| Do you feel your current equipment is efficient?                           | <input type="checkbox"/> Yes           | <input type="checkbox"/> No            | <input type="checkbox"/> Not sure      |                                        |                                                   |
| Do you think about load distribution when loading the cart?                | <input type="checkbox"/> Yes           | <input type="checkbox"/> No            | <input type="checkbox"/> Not sure      |                                        |                                                   |
| If "Yes", how do you aim to distribute the load?                           | .....                                  |                                        |                                        |                                        |                                                   |

| Animal Equipment Interaction                                           |                              |                             |                                    |                                   |                                       |                                |
|------------------------------------------------------------------------|------------------------------|-----------------------------|------------------------------------|-----------------------------------|---------------------------------------|--------------------------------|
| Do you remove the harness from the animal during rest periods at work? | <input type="checkbox"/> Yes | <input type="checkbox"/> No | <input type="checkbox"/> Sometimes |                                   |                                       |                                |
| Do you think the harness can influence the animal's ability to work?   | <input type="checkbox"/> Yes | <input type="checkbox"/> No | <input type="checkbox"/> Not sure  |                                   |                                       |                                |
| Do you think the cart can influence the animal's ability to work?      | <input type="checkbox"/> Yes | <input type="checkbox"/> No | <input type="checkbox"/> Not sure  |                                   |                                       |                                |
| Do you feel your current equipment is comfortable for the animal?      | <input type="checkbox"/> Yes | <input type="checkbox"/> No | <input type="checkbox"/> Not sure  |                                   |                                       |                                |
| In the past year, how many times has your animal been lame?            | ..... times                  |                             |                                    | <input type="checkbox"/> Not sure |                                       |                                |
| In the past year, has your animal developed harness related wounds?    | <input type="checkbox"/> Yes | <input type="checkbox"/> No | <input type="checkbox"/> Not sure  | If "Yes", how often?              | <input type="checkbox"/> Rarely       |                                |
|                                                                        |                              |                             |                                    |                                   | <input type="checkbox"/> Occasionally | <input type="checkbox"/> Often |
|                                                                        |                              |                             |                                    |                                   | <input type="checkbox"/> Very often   |                                |
| Do you take any measures to prevent the development of wounds?         | <input type="checkbox"/> Yes | <input type="checkbox"/> No | If "Yes", which measures?<br>..... |                                   |                                       |                                |

| Comments |
|----------|
| <br><br> |
